# Supplementary material for: Design of softened polystyrene for crack- and contamination-free large-area graphene transfer
Source: Royal Society of Chemistry journal article supplement (doi:10.1039/c8nr05611k), 2018-01-01

## Supporting Information

### Design of Softened Polystyrene for Crack- and Contamination-Free Large-Area Graphene Transfer

*Tuqeer Nasir<sup>#</sup>, Bum Jun Kim<sup>#</sup>, Kwan Woo Kim, Sang Hoon Lee, Hyung Kyu Lim, Dong Kyu Lee, Byung Joo Jeong, Hak Chul Kim, Hak Ki Yu\*, and Jae-Young Choi\**

**Table S1.** FTIR peak positions corresponding to polystyrene and DIPB

| Wavenumber (cm <sup>-1</sup> ) | Assignment                                                 |
|--------------------------------|------------------------------------------------------------|
| 3085, 3020                     | C-H (sp <sup>2</sup> , aromatic)                           |
| 2924, 2840                     | C-H (sp <sup>3</sup> , stretch)                            |
| 1642, 1479                     | C=C (stretch)                                              |
| 1467, 1378                     | CH <sub>2</sub> , CH <sub>3</sub> (sp <sup>3</sup> , bend) |
| 1030                           | =C-H (bending in ring plane)                               |
| 750, 670                       | =C-H (oop bending)                                         |
| 820                            | Para-disub benzene                                         |

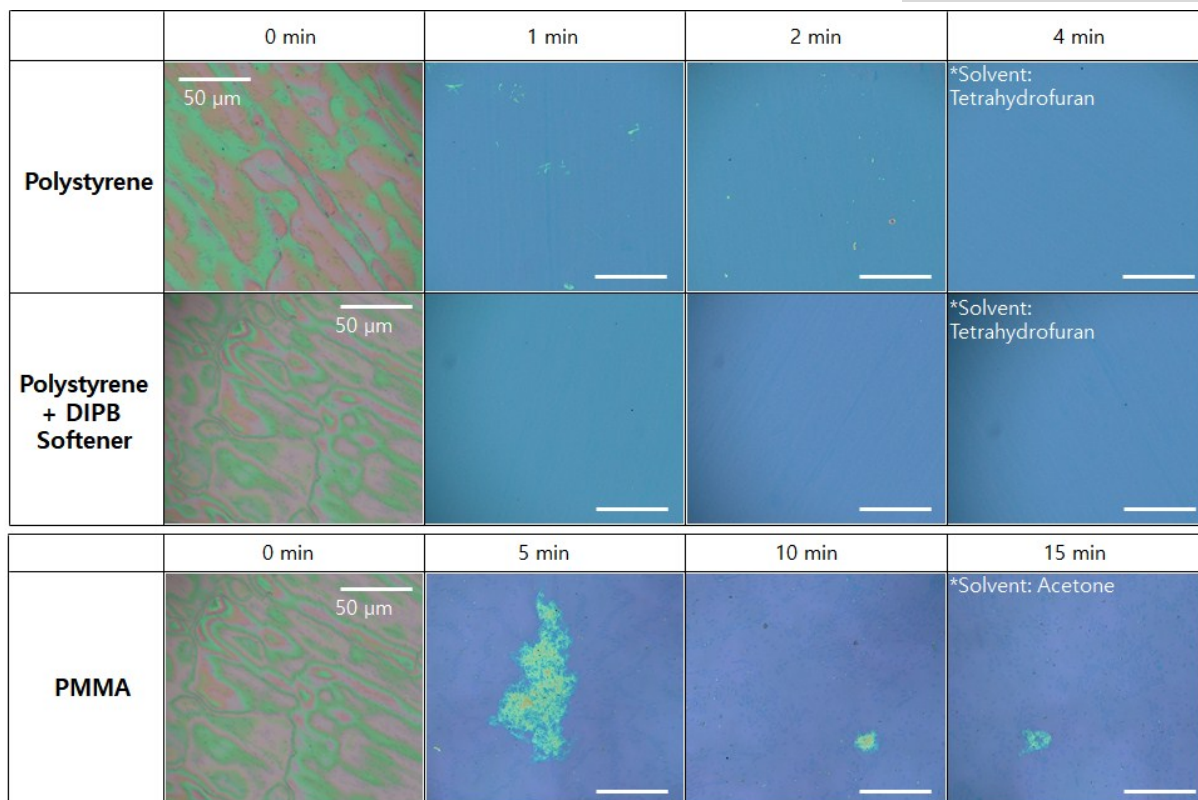

**Figure S1.** Comparison of solubility rate in organic solvents by optical microscopy (PS and PS with DIPB in THF solvent, PMMA in acetone solvent).

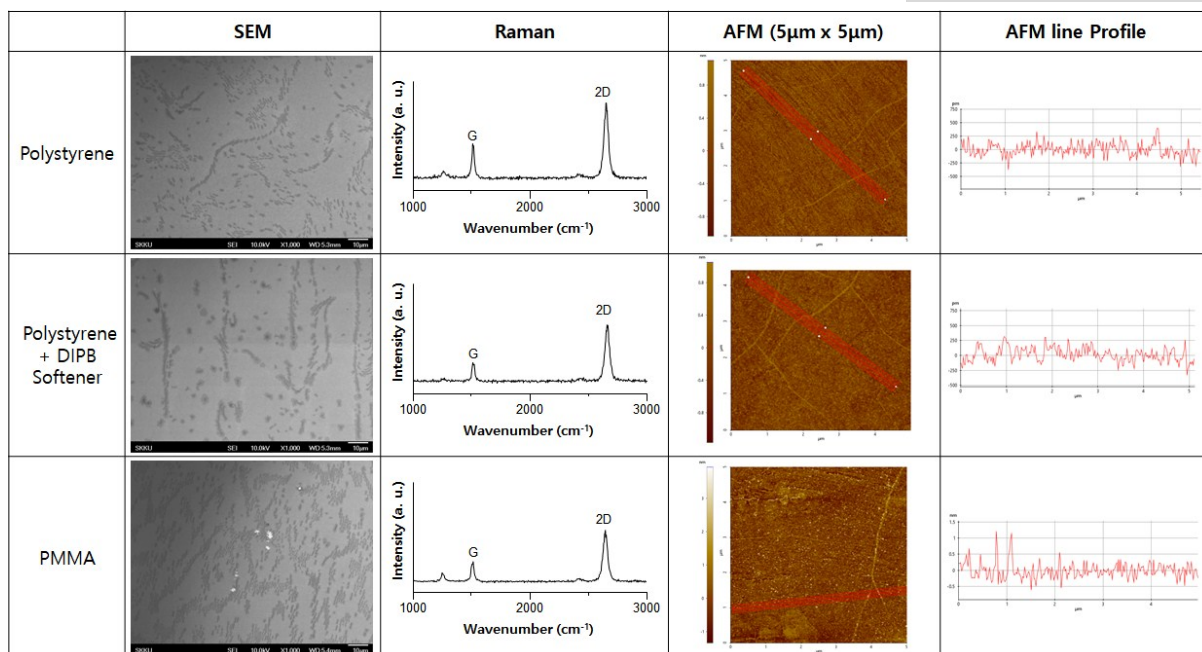

**Figure S2.** SEM images, Raman spectra, and AFM images (graphene on SiO<sub>2</sub>/Si substrate, after removing polymer carrier films (PS, PS with DIBP, and PMMA).

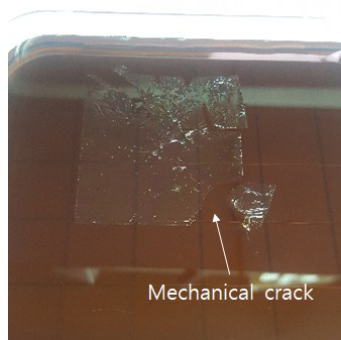

**PMMA**/graphene layer  
on copper etchant

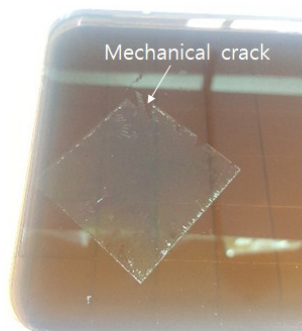

**PS**/graphene layer  
on copper etchant

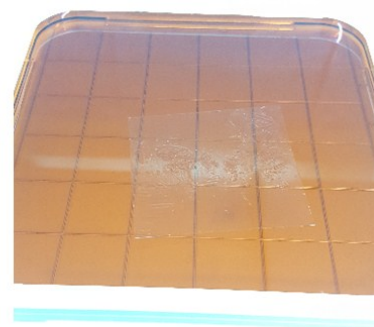

**PS+DIPB**/graphene layer  
on copper etchant

**Figure S3.** Mechanical cracks on carrier film during Cu-etching over large area (5 cm × 5 cm)

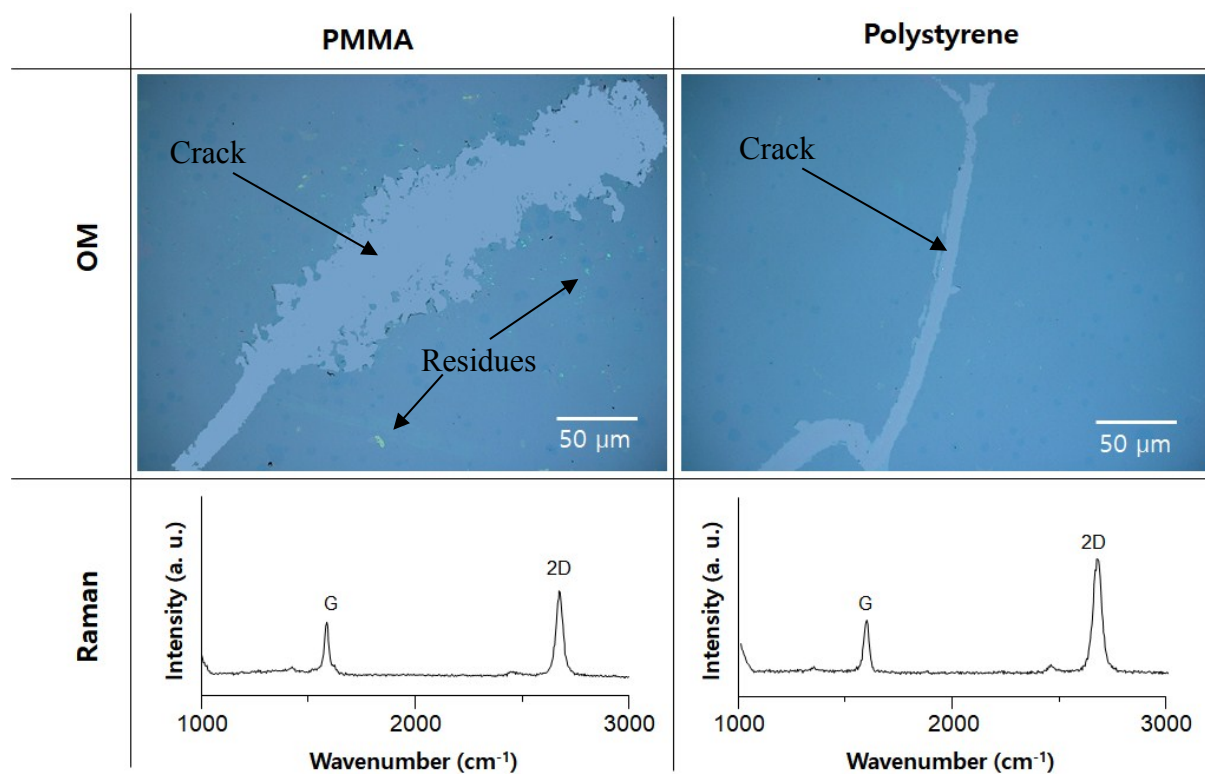

**Figure S4.** Test for feasibility of large-scale roll-to-roll transfer ( $10\text{ cm} \times 10\text{ cm}$  size) using PMMA and pure PS carrier films. Graphene transferred by PMMA has large mechanical crack and a number of residues. Graphene transferred by pure PS without softener does have mechanical crack without any residues.

**Table S2.** Sheet resistance measurement of graphene transferred by PMMA, polystyrene and polystyrene + DIPB

| Sheet resistance measurement with no bending stress applied                       |                                      |         |         |         |         |         |         |         |         |                                   |
|-----------------------------------------------------------------------------------|--------------------------------------|---------|---------|---------|---------|---------|---------|---------|---------|-----------------------------------|
| Support Polymer                                                                   | Sheet Resistance $\Omega/\text{sq.}$ |         |         |         |         |         |         |         |         | Average $R_s$ $\Omega/\text{sq.}$ |
|                                                                                   | Point 1                              | Point 2 | Point 3 | Point 4 | Point 5 | Point 6 | Point 7 | Point 8 | Point 9 |                                   |
| PMMA                                                                              | 553                                  | 727     | 678     | 806     | 950     | 524     | 340     | 552     | 430     | 617.8                             |
| PS                                                                                | 371                                  | 481     | 526     | 481     | 419     | 296     | 326     | 271     | 315     | 387.3                             |
| PS + DIPB Softener                                                                | 444                                  | 405     | 456     | 225     | 540     | 424     | 351     | 203     | 331     | 375.4                             |
| Sheet resistance measurement after roll to roll transfer (Bending stress applied) |                                      |         |         |         |         |         |         |         |         |                                   |
| Support Polymer                                                                   | Sheet Resistance $\Omega/\text{sq.}$ |         |         |         |         |         |         |         |         | Average $R_s$ $\Omega/\text{sq.}$ |
|                                                                                   | Point 1                              | Point 2 | Point 3 | Point 4 | Point 5 | Point 6 | Point 7 | Point 8 | Point 9 |                                   |
| PMMA                                                                              | 649                                  | X       | 781     | X       | 594     | X       | 961     | 642     | X       | 725.4                             |
| PS                                                                                | 339                                  | 368     | X       | 350     | 360     | X       | 564     | X       | 564     | 424.2                             |
| PS + DIPB Softener                                                                | 305                                  | 450     | 392     | 362     | 216     | 512     | 261     | 360     | 412     | 363.3                             |

Measurement Points for Sheet Resistance measurement

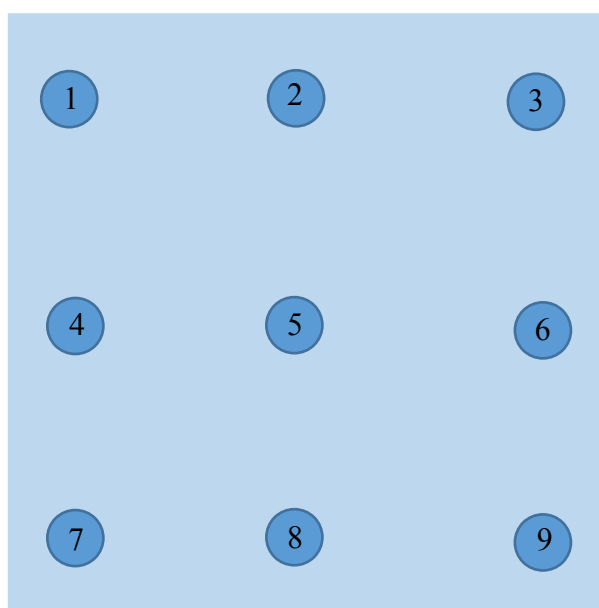

Supplement: c8nr05611k1.pdf [file c8nr05611k1.pdf]
